# Supplementary material for: Anion-driven selective colorimetric detection of Hg2+and Fe3+using functionalized silver nanoparticles
Source: Royal Society of Chemistry journal article supplement (doi:10.1039/c3ra44945a), 2013-11-15
Supplement: c3ra44945a.pdf [file c3ra44945a.pdf]

## Supporting Information

### **Anion-driven selective colorimetric detection of Hg<sup>2+</sup> and Fe<sup>3+</sup> using functionalized silver nanoparticles**

**Shilpa Bothra<sup>a</sup>, Jignasa N. Solanki<sup>b</sup>, Suban K Sahoo<sup>a,\*</sup> and John F Callan<sup>c</sup>**

*<sup>a</sup>Department of Applied Chemistry, SV National Institute of Technology (SVNIT), Surat-395007, India.*

*<sup>b</sup>Department of Chemical Engineering, SV National Institute of Technology (SVNIT), Surat-395007, India*

*<sup>c</sup>Department of Pharmacy and Pharmaceutical Sciences, School of Biomedical Sciences, The University of Ulster, Northern Ireland, BT52 1SA*

\*Corresponding author (Dr SK Sahoo): E-mail:suban\_sahoo@rediffmail.com; Mob: +91-261-2201814.

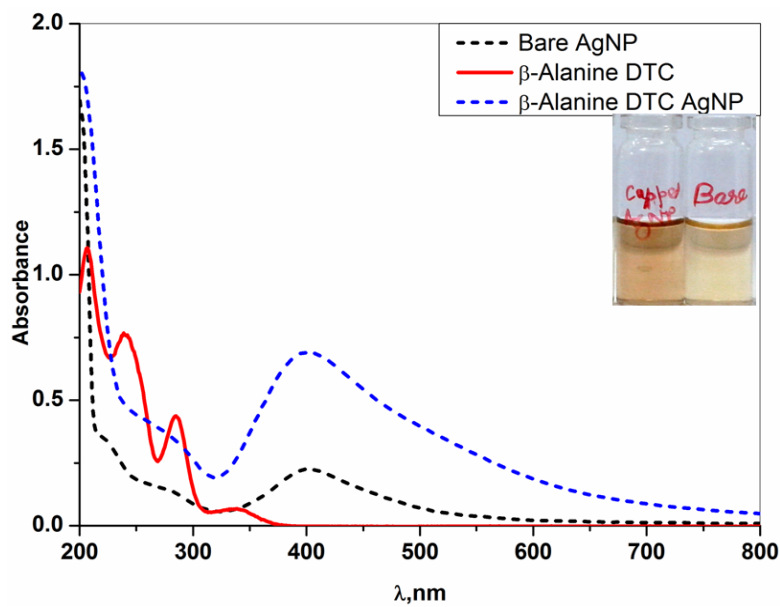

**Fig. 1S.** UV-Vis spectra of  $\beta$ -Alanine Dithiocarbamate, bare AgNPs and  $\beta$ -Alanine Dithiocarbamate modified AgNPs. Inset: Photographic image of bare AgNPs and  $\beta$ -Alanine Dithiocarbamate modified AgNPs.

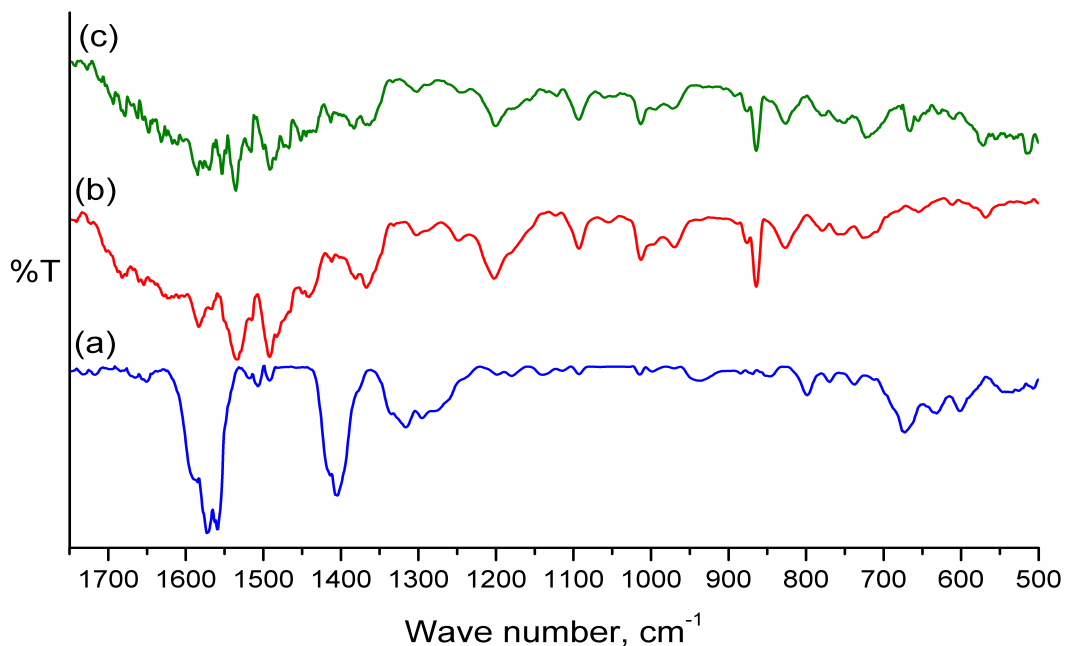

**Fig. 2S.** FT-IR Spectra of (a)  $\beta$ -Alanine Dithiocarbamate (ADTC), (b) ADTC functionalized AgNPs and (c) ADTC functionalized AgNPs in the presence of  $\text{Hg}^{2+}$ .

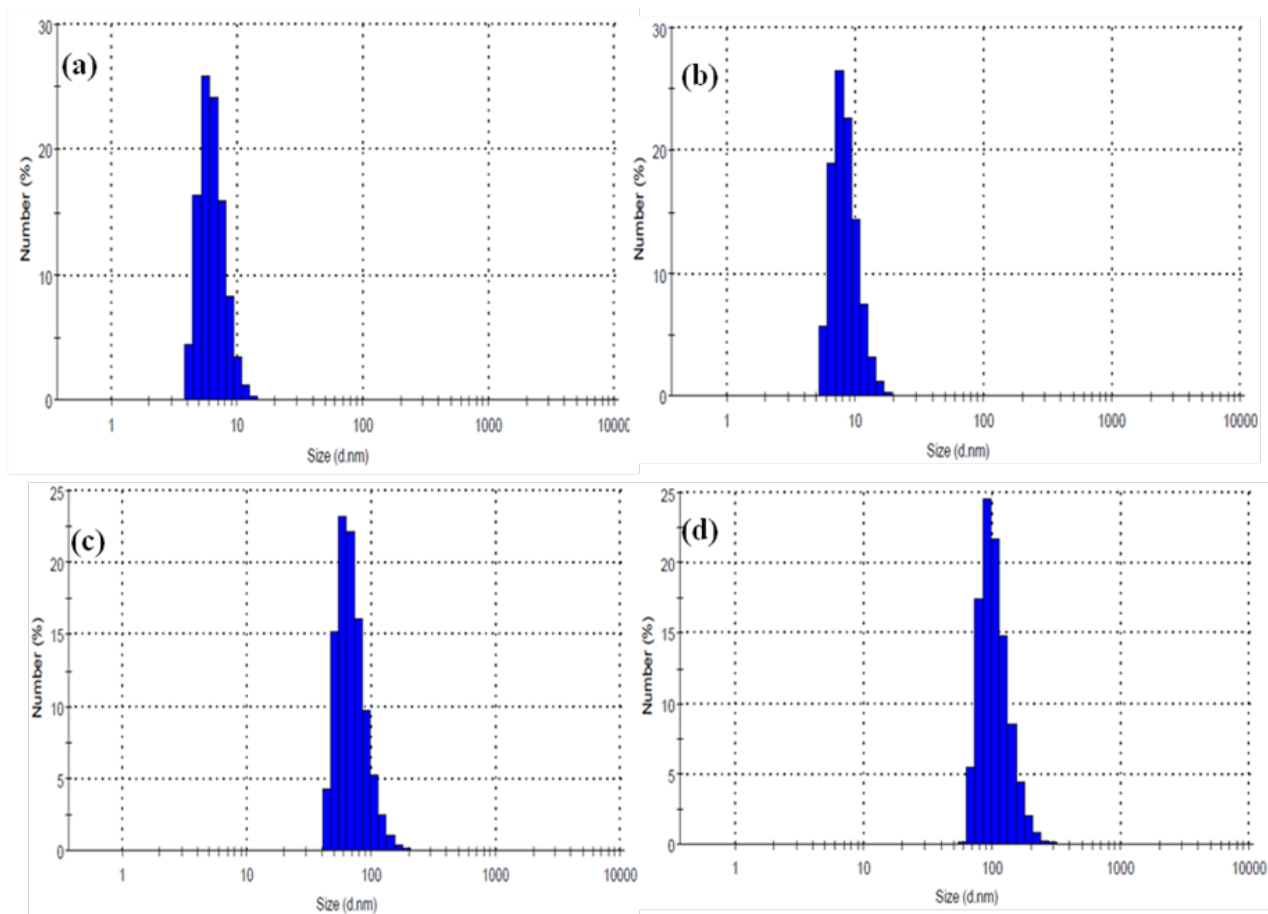

**Fig. 3S.** DLS data of (a)  $\beta$ -Alanine Dithiocarbamate modified AgNPs (b)  $\beta$ -Alanine Dithiocarbamate modified AgNPs in the presence of 10mM NaCl (c)  $\beta$ -Alanine Dithiocarbamate modified AgNPs in presence of  $\text{Hg}^{2+}$  (d)  $\beta$ -Alanine Dithiocarbamate modified AgNPs in presence of  $\text{Fe}^{3+}$ .

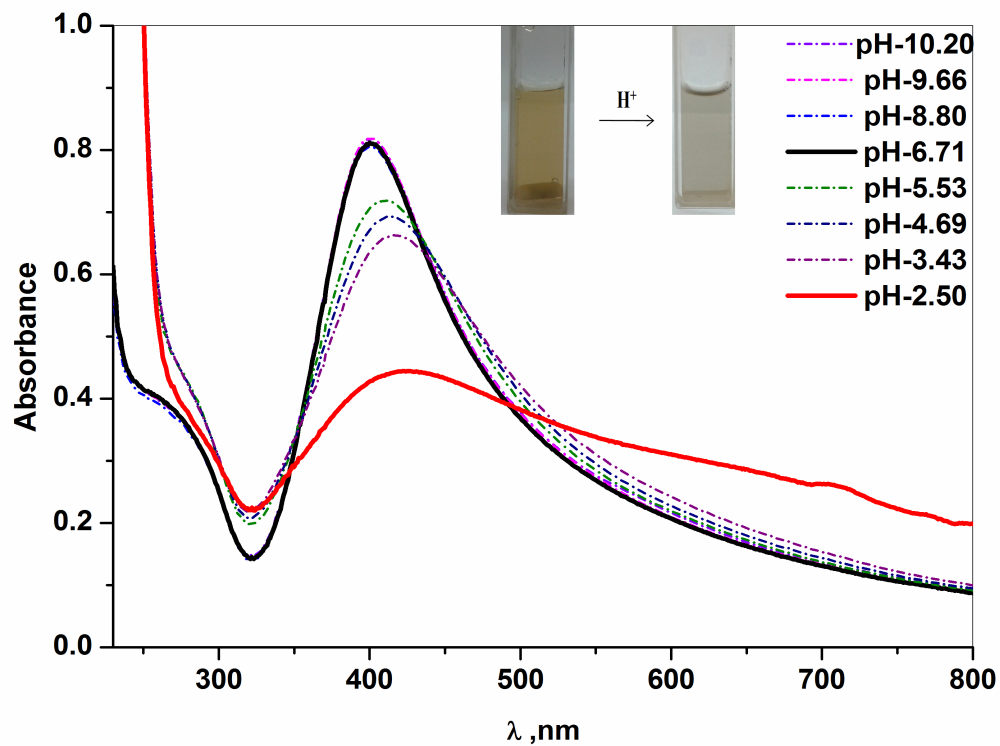

**Fig. 4S.** UV-Vis spectral observations of ADTC functionalized AgNPs at different pH. Inset shows the color change of AgNPs from yellow (pH of AgNPs = 6.71) to colorless (pH = 2.50).

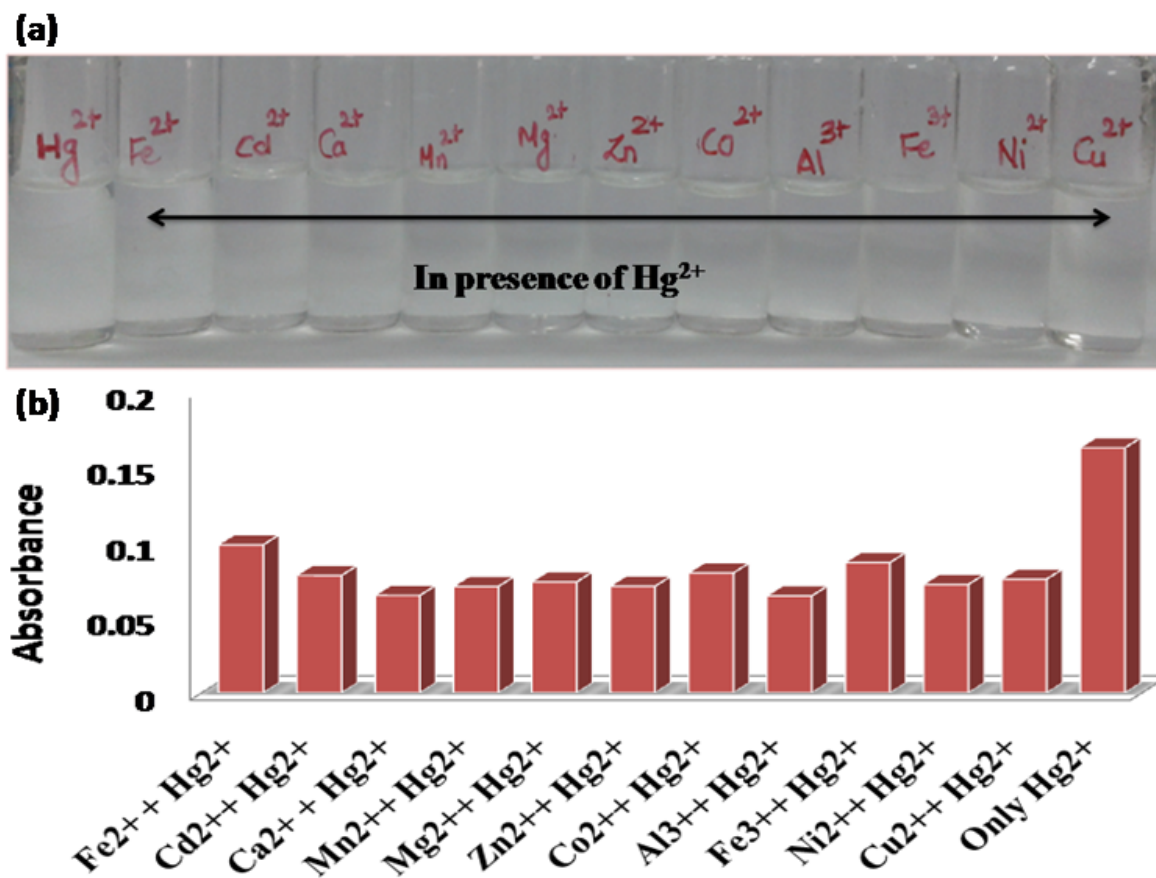

**Fig. 5S.** Interference for the detection of Hg<sup>2+</sup> in the presence of equimolar amount of other metal ions.

(a)

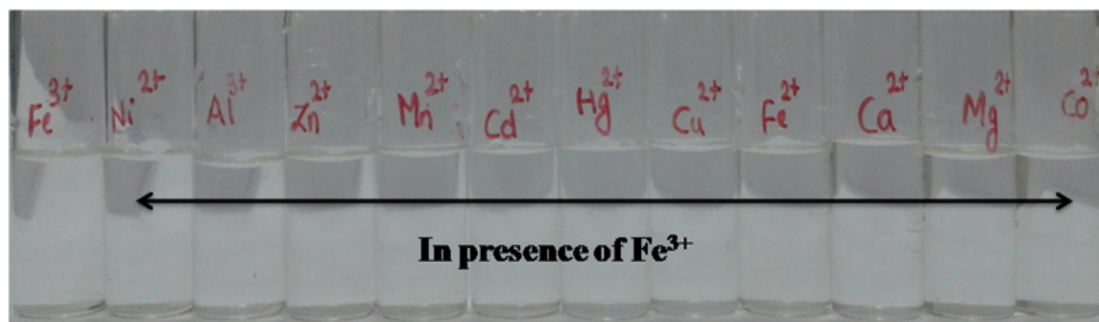

(b)

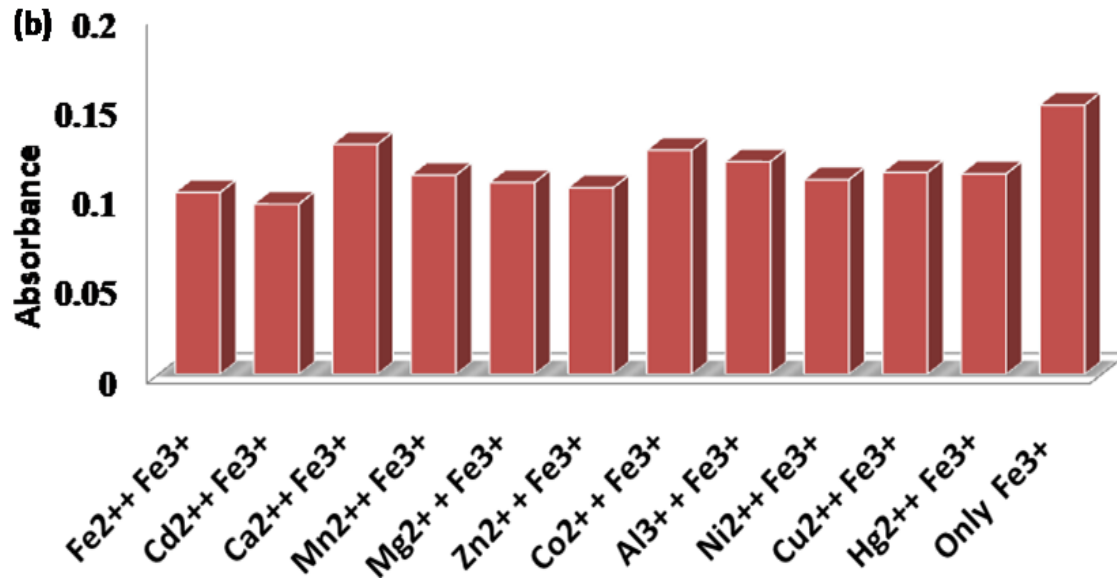

Fig. 6S. Interference for the detection of  $\text{Fe}^{3+}$  in the presence of equimolar amount of other metal ions.

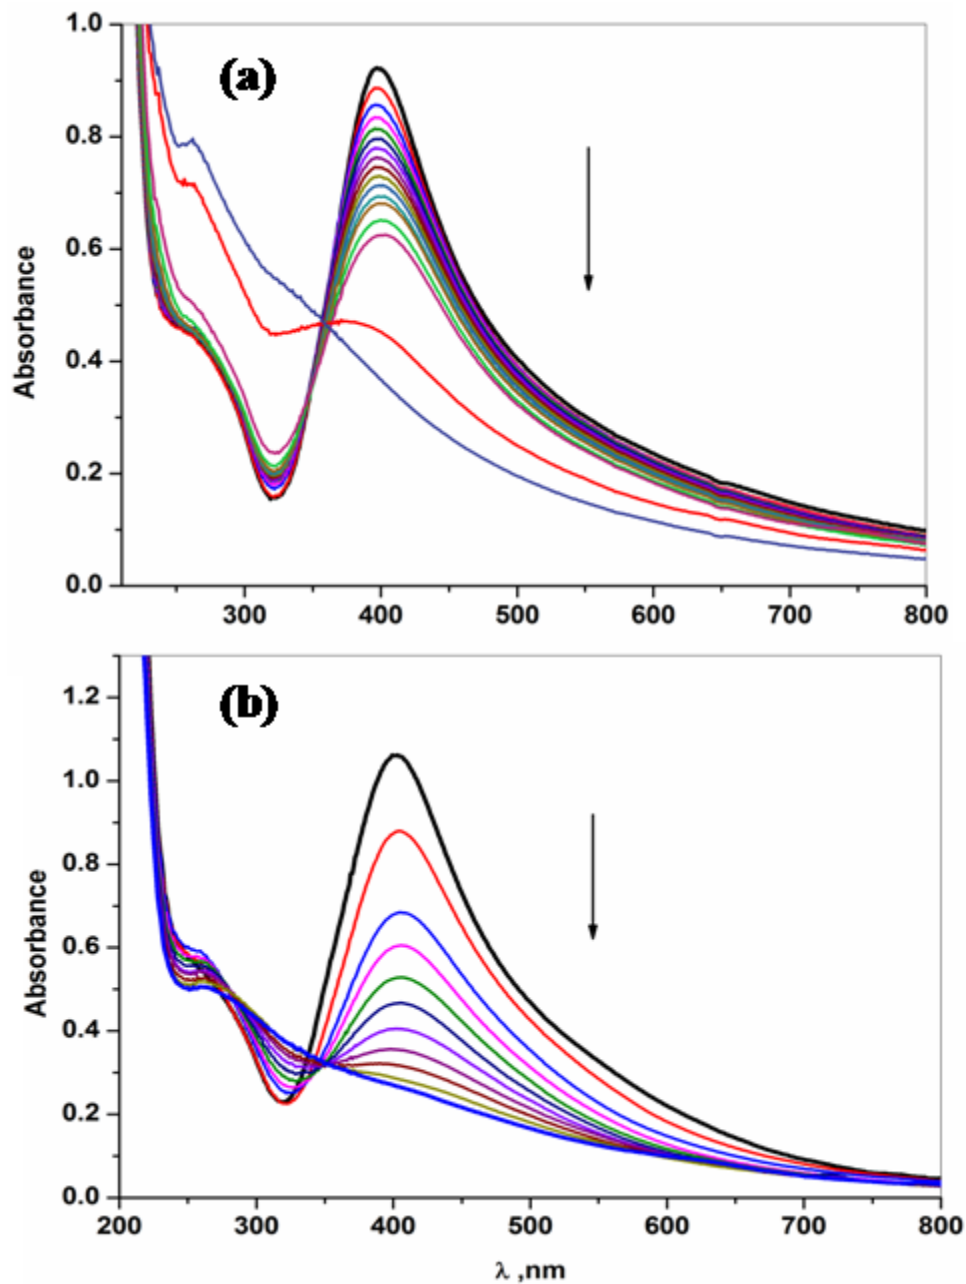

**Fig. 7S.** UV-Vis spectra of the functionalized AgNPs at various concentrations of (a)  $\text{Hg}^{2+}$  from  $4.97 \times 10^{-6}$  to  $7.4 \times 10^{-5}$  M and (b)  $\text{Fe}^{3+}$  from  $4.97 \times 10^{-6}$  to  $5.66 \times 10^{-5}$  M.

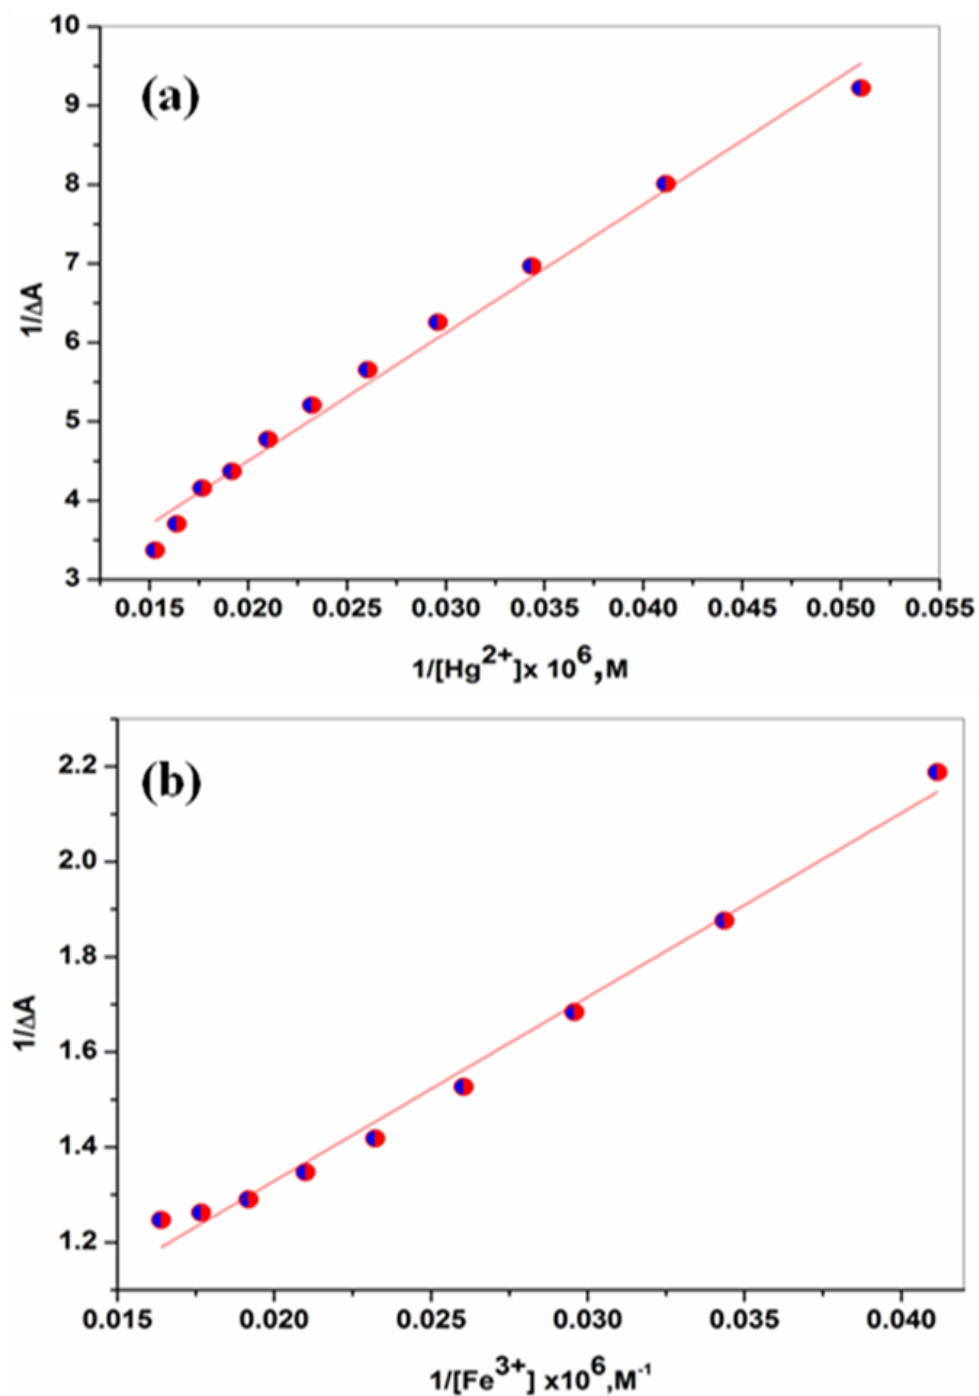

**Fig. 8S.** Benesi-Hildebrand plots for  $\beta$ -Alanine Dithiocarbamate functionalized AgNPs in the presence of (a)  $Hg^{2+}$  [ $4.97 \times 10^{-6}$  -  $7.4 \times 10^{-5}$  M] and (b)  $Fe^{3+}$  [ $4.97 \times 10^{-6}$  -  $5.66 \times 10^{-5}$  M] ions.



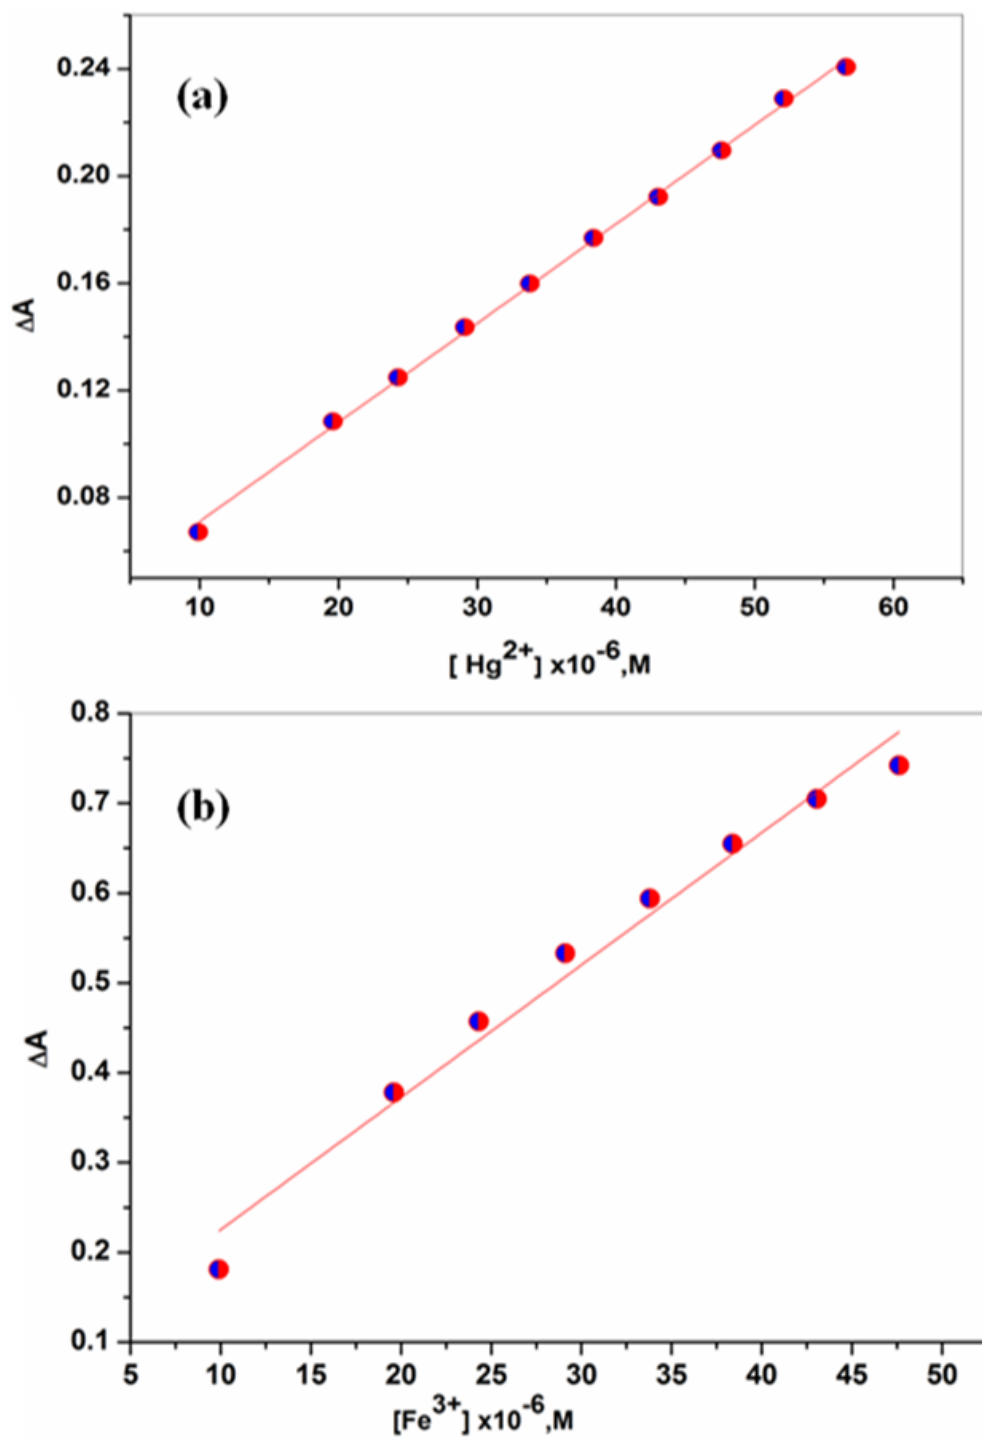

**Fig. 9S.** Calibration curve for quantification of (a) Hg<sup>2+</sup> and (b) Fe<sup>3+</sup> using β-Alanine Dithiocarbamate functionalized AgNPs.

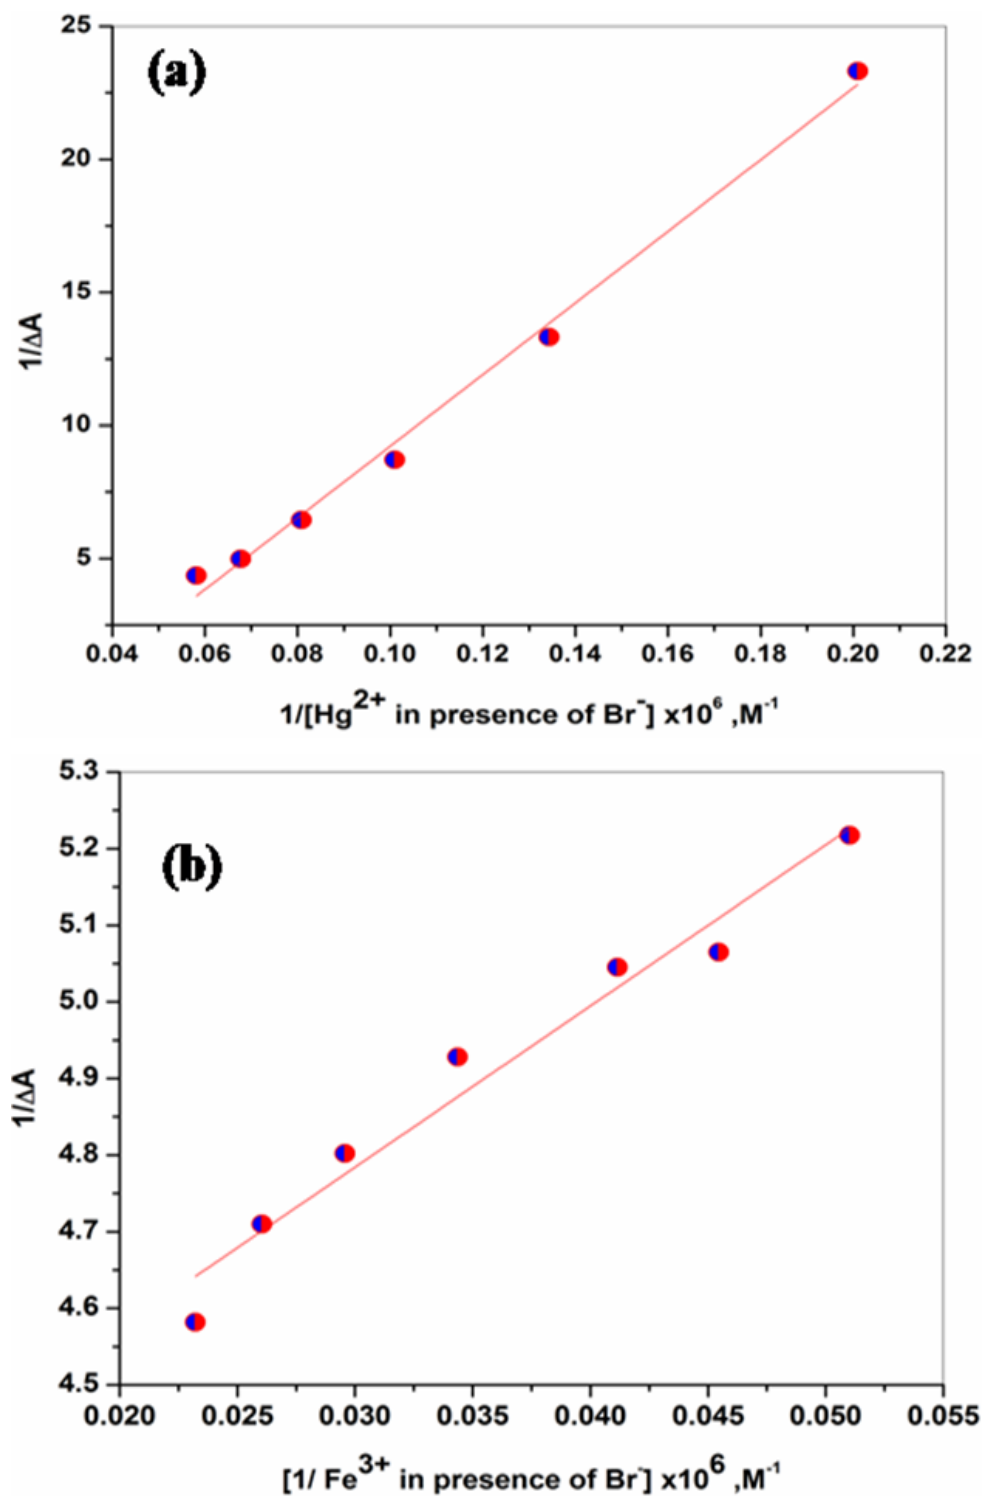

**Fig. 10S.** Benesi-Hildebrand plots for  $\beta$ -Alanine Dithiocarbamate functionalized AgNPs in the presence of (a)  $\text{Hg}^{2+}$  in presence of  $\text{Br}^-$  and (b)  $\text{Fe}^{3+}$  in presence of  $\text{Cl}^-$ .

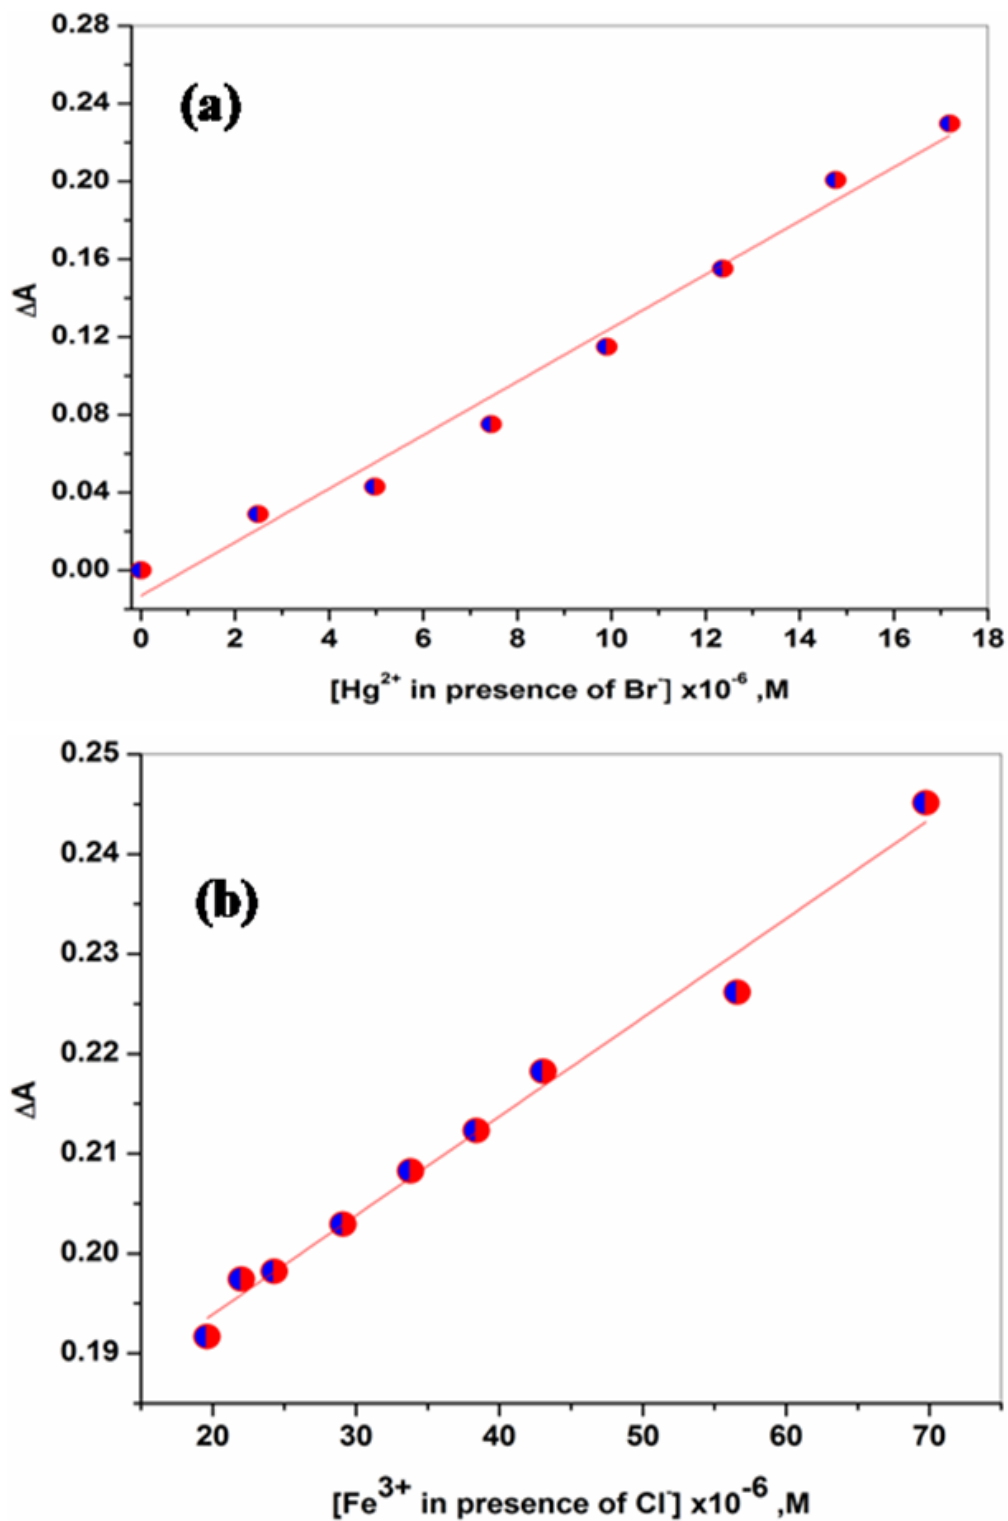

**Fig. 11S.** Calibration curve for quantification of (a)  $\text{Hg}^{2+}$  in presence of  $\text{Br}^-$  and (b)  $\text{Fe}^{3+}$  in presence of  $\text{Cl}^-$  using  $\beta$ -Alanine Dithiocarbamate functionalized AgNPs.

**Table 1S.** DLS: variation in the average hydrodynamic diameter of AgNPs on addition of different concentration of  $\text{Hg}^{2+}$  and  $\text{Fe}^{3+}$  ( $1.0 \times 10^{-3}$  M).

| <b>Sr. No.</b> | <b>Samples</b>                                                 | <b>hydrodynamic diameter, d (nm)</b> |
|----------------|----------------------------------------------------------------|--------------------------------------|
| 1.             | ADTC functionalized AgNPs                                      | 5.615                                |
| 2.             | ADTC functionalized AgNPs + 100 $\mu\text{l}$ $\text{Hg}^{2+}$ | 58.77                                |
| 3.             | ADTC functionalized AgNPs + 200 $\mu\text{l}$ $\text{Hg}^{2+}$ | 78.82                                |
| 4.             | ADTC functionalized AgNPs + 50 $\mu\text{l}$ $\text{Fe}^{3+}$  | 68.06                                |
| 5.             | ADTC functionalized AgNPs + 100 $\mu\text{l}$ $\text{Fe}^{3+}$ | 91.28                                |

**Table 2S.** Comparison of the present AgNPs system for the detection of Hg<sup>2+</sup> and Fe<sup>3+</sup> with the previously reported methods.

| AgNPs systems                                   | SPR band | LOD        | References           |
|-------------------------------------------------|----------|------------|----------------------|
| <b>Hg<sup>2+</sup></b>                          |          |            |                      |
| ADTC- AgNPs                                     | 402 nm   | 4.89 μM    | <b>Present Study</b> |
| ADTC- AgNPs in presence of Br <sup>-</sup>      | 402 nm   | 2.54 μM    | <b>Present Study</b> |
| <i>p</i> -phenylenediamine functionalized AgNPs | 411 nm   | 0.80 μM    | [1]                  |
| Unmodified AgNPs                                | 408 nm   | 2.2 μM     | [2]                  |
| Starch stabilized AgNPs                         | 390 nm   | ~5 ppb     | [3]                  |
| Citrate Capped AgNPs                            | 394 nm   | 6.6 nM     | [4]                  |
| Adenosine monophosphate capped AgNPs            | 423 nm   | 0.5 nM     | [5]                  |
| <b>Fe<sup>3+</sup></b>                          |          |            |                      |
| ADTC- AgNPs                                     | 402 nm   | 6.18 μM    | <b>Present Study</b> |
| ADTC- AgNPs in presence of Cl <sup>-</sup>      | 402 nm   | 6.08 μM    | <b>Present Study</b> |
| <i>p</i> -phenylenediamine functionalized AgNPs | 411 nm   | 1.29 μM    | [1]                  |
| Calix[4]arene stabilized AgNPs                  | 414 nm   | Micromolar | [6]                  |

### References

- [1] S. Bothra, J.N. Solanki and S.K. Sahoo, *Sensors and Actuators B*, 2013, **188**, 937.  
 [2] K. Farhadi, M. Forough, R. Molaei, S. Hajizadeh, A. Rafipour, *Sensor Actuat B*, 2012, **161**, 880.  
 [3] Y. Fan, Z. Liu, L. Wang, J. Zhan, *Nanoscale Res Lett*, 2009, **4**, 1230.  
 [4] L. P. Wu, H.W. Zhao, Z. H. Qin, X.Y. Zhao, W.D. Pu, *Journal of Analytical methods in chemistry*, 2012, **2012**, Article ID 856947.  
 [5] H. Tan, B. Liu, Y. Chang, *Plasmonics*, 2012, **2**, 9461.  
 [6] J. Zhan, L. Wen, F. Miao, D. Tian, X. Zhu and H. Li, *New J. Chem.*, 2012, **36**, 656.
